# Supplementary material for: Identification of novel early pancreatic cancer biomarkers KIF5B and SFRP2 from “first contact” interactions in the tumor microenvironment
Source: PubMed Central journal article supplement (PMC9400270; doi:10.1186/s13046-022-02425-y), 2022-08-24
Supplement: 13046_2022_2425_MOESM8_ESM.pdf [file 13046_2022_2425_MOESM8_ESM.pdf]

# **KPC Cancer Cells GO analysis of 721 Identified proteins**

# Cellular Component

| GO term                    | Description                              | P-value | FDR q-value | Enrichment (N, B, n, b) |
|----------------------------|------------------------------------------|---------|-------------|-------------------------|
| <a href="#">GO:0044421</a> | extracellular region part                | 4.19E-8 | 3.49E-5     | 1.47 (625,215,216,109)  |
| <a href="#">GO:0005576</a> | extracellular region                     | 4.51E-8 | 1.88E-5     | 1.52 (625,185,218,98)   |
| <a href="#">GO:0005615</a> | extracellular space                      | 1.87E-5 | 5.18E-3     | 1.46 (625,169,216,85)   |
| <a href="#">GO:0009986</a> | cell surface                             | 1.87E-5 | 3.9E-3      | 1.99 (625,61,180,35)    |
| <a href="#">GO:0031012</a> | extracellular matrix                     | 3.45E-5 | 5.74E-3     | 2.76 (625,101,47,21)    |
| <a href="#">GO:0062023</a> | collagen-containing extracellular matrix | 8.14E-5 | 1.13E-2     | 1.82 (625,88,160,41)    |
| <a href="#">GO:0043209</a> | myelin sheath                            | 1.37E-4 | 1.63E-2     | 2.72 (625,48,91,19)     |
| <a href="#">GO:0005584</a> | collagen type I trimer                   | 4E-4    | 4.17E-2     | 48.08 (625,2,13,2)      |
| <a href="#">GO:0048471</a> | perinuclear region of cytoplasm          | 6.13E-4 | 5.67E-2     | 2.53 (625,66,71,19)     |
| <a href="#">GO:0042641</a> | actomyosin                               | 7.52E-4 | 6.27E-2     | 8.22 (625,10,38,5)      |
| <a href="#">GO:0016234</a> | inclusion body                           | 8.68E-4 | 6.57E-2     | 16.74 (625,4,28,3)      |

# Molecular Function

| <b>GO term</b>             | <b>Description</b>                | <b><u>P-value</u></b> | <b><u>FDR q-value</u></b> | <b><u>Enrichment (N, B, n, b)</u></b> |
|----------------------------|-----------------------------------|-----------------------|---------------------------|---------------------------------------|
| <a href="#">GO:0005102</a> | signaling receptor binding        | 3.52E-5               | 4.21E-2                   | 1.47 (625,127,251,75)                 |
| <a href="#">GO:0005515</a> | protein binding                   | 1.41E-4               | 8.41E-2                   | 1.12 (625,479,248,213)                |
| <a href="#">GO:0051015</a> | actin filament binding            | 3.06E-4               | 1.22E-1                   | 2.39 (625,24,185,17)                  |
| <a href="#">GO:0003779</a> | actin binding                     | 3.19E-4               | 9.54E-2                   | 2.08 (625,39,185,24)                  |
| <a href="#">GO:0019838</a> | growth factor binding             | 3.93E-4               | 9.4E-2                    | 2.30 (625,30,172,19)                  |
| <a href="#">GO:0019899</a> | enzyme binding                    | 4.61E-4               | 9.2E-2                    | 1.38 (625,148,248,81)                 |
| <a href="#">GO:0001786</a> | phosphatidylserine binding        | 5.97E-4               | 1.02E-1                   | 10.96 (625,6,38,4)                    |
| <a href="#">GO:0032557</a> | pyrimidine ribonucleotide binding | 8.77E-4               | 1.31E-1                   | 32.89 (625,2,19,2)                    |
| <a href="#">GO:0032551</a> | pyrimidine ribonucleoside binding | 8.77E-4               | 1.17E-1                   | 32.89 (625,2,19,2)                    |
| <a href="#">GO:0002135</a> | CTP binding                       | 8.77E-4               | 1.05E-1                   | 32.89 (625,2,19,2)                    |
| <a href="#">GO:0002134</a> | UTP binding                       | 8.77E-4               | 9.54E-2                   | 32.89 (625,2,19,2)                    |
| <a href="#">GO:0001884</a> | pyrimidine nucleoside binding     | 8.77E-4               | 8.75E-2                   | 32.89 (625,2,19,2)                    |
| <a href="#">GO:0070182</a> | DNA polymerase binding            | 8.77E-4               | 8.07E-2                   | 32.89 (625,2,19,2)                    |
| <a href="#">GO:0019103</a> | pyrimidine nucleotide binding     | 8.77E-4               | 7.5E-2                    | 32.89 (625,2,19,2)                    |
| <a href="#">GO:0017098</a> | sulfonylurea receptor binding     | 8.77E-4               | 7E-2                      | 32.89 (625,2,19,2)                    |

# Biological Processes

| GO term                    | Description                                                                            | P-value | FDR q-value | Enrichment (N, B, n, b) |
|----------------------------|----------------------------------------------------------------------------------------|---------|-------------|-------------------------|
| <a href="#">GO:0071310</a> | cellular response to organic substance                                                 | 5.23E-6 | 3.27E-2     | 2.10 (625,110,103,38)   |
| <a href="#">GO:0034097</a> | response to cytokine                                                                   | 6.87E-6 | 2.15E-2     | 2.84 (625,47,103,22)    |
| <a href="#">GO:0010033</a> | response to organic substance                                                          | 7.91E-6 | 1.65E-2     | 1.90 (625,144,103,45)   |
| <a href="#">GO:0009653</a> | anatomical structure morphogenesis                                                     | 8.79E-6 | 1.37E-2     | 3.09 (625,92,44,20)     |
| <a href="#">GO:0048856</a> | anatomical structure development                                                       | 1.01E-5 | 1.26E-2     | 2.14 (625,176,53,32)    |
| <a href="#">GO:0070887</a> | cellular response to chemical stimulus                                                 | 1.28E-5 | 1.33E-2     | 1.96 (625,127,103,41)   |
| <a href="#">GO:0060351</a> | cartilage development involved in endochondral bone morphogenesis                      | 1.31E-5 | 1.17E-2     | 26.04 (625,6,16,4)      |
| <a href="#">GO:0071345</a> | cellular response to cytokine stimulus                                                 | 2.55E-5 | 1.99E-2     | 3.09 (625,40,91,18)     |
| <a href="#">GO:0085029</a> | extracellular matrix assembly                                                          | 2.72E-5 | 1.89E-2     | 15.24 (625,4,41,4)      |
| <a href="#">GO:0032270</a> | positive regulation of cellular protein metabolic process                              | 3.11E-5 | 1.94E-2     | 1.40 (625,103,334,77)   |
| <a href="#">GO:0031214</a> | biomineral tissue development                                                          | 3.48E-5 | 1.97E-2     | 24.04 (625,8,13,4)      |
| <a href="#">GO:0045597</a> | positive regulation of cell differentiation                                            | 5.61E-5 | 2.92E-2     | 2.31 (625,73,100,27)    |
| <a href="#">GO:0032502</a> | developmental process                                                                  | 6.13E-5 | 2.95E-2     | 1.76 (625,254,53,38)    |
| <a href="#">GO:0030334</a> | regulation of cell migration                                                           | 6.33E-5 | 2.83E-2     | 1.57 (625,89,251,56)    |
| <a href="#">GO:0051270</a> | regulation of cellular component movement                                              | 6.34E-5 | 2.64E-2     | 1.54 (625,97,251,60)    |
| <a href="#">GO:2000145</a> | regulation of cell motility                                                            | 6.36E-5 | 2.48E-2     | 1.55 (625,93,251,58)    |
| <a href="#">GO:0017015</a> | regulation of transforming growth factor beta receptor signaling pathway               | 7.06E-5 | 2.6E-2      | 4.75 (625,13,91,9)      |
| <a href="#">GO:1903844</a> | regulation of cellular response to transforming growth factor beta stimulus            | 7.06E-5 | 2.45E-2     | 4.75 (625,13,91,9)      |
| <a href="#">GO:0048518</a> | positive regulation of biological process                                              | 7.44E-5 | 2.45E-2     | 1.15 (625,310,378,216)  |
| <a href="#">GO:0042221</a> | response to chemical                                                                   | 8.85E-5 | 2.77E-2     | 1.73 (625,170,100,47)   |
| <a href="#">GO:0003417</a> | growth plate cartilage development                                                     | 1.34E-4 | 3.99E-2     | 29.30 (625,4,16,3)      |
| <a href="#">GO:0009888</a> | tissue development                                                                     | 1.4E-4  | 3.98E-2     | 3.77 (625,49,44,13)     |
| <a href="#">GO:0051240</a> | positive regulation of multicellular organismal process                                | 1.49E-4 | 4.05E-2     | 1.81 (625,124,114,41)   |
| <a href="#">GO:0040012</a> | regulation of locomotion                                                               | 1.57E-4 | 4.07E-2     | 1.50 (625,101,251,61)   |
| <a href="#">GO:0051216</a> | cartilage development                                                                  | 1.77E-4 | 4.42E-2     | 17.36 (625,9,16,4)      |
| <a href="#">GO:0051247</a> | positive regulation of protein metabolic process                                       | 1.84E-4 | 4.43E-2     | 1.36 (625,109,334,79)   |
| <a href="#">GO:1900180</a> | regulation of protein localization to nucleus                                          | 1.87E-4 | 4.32E-2     | 4.96 (625,12,84,8)      |
| <a href="#">GO:0016049</a> | cell growth                                                                            | 1.92E-4 | 4.29E-2     | 4.00 (625,9,139,8)      |
| <a href="#">GO:0061448</a> | connective tissue development                                                          | 2.07E-4 | 4.47E-2     | 9.53 (625,8,41,5)       |
| <a href="#">GO:0090092</a> | regulation of transmembrane receptor protein serine/threonine kinase signaling pathway | 2.21E-4 | 4.6E-2      | 3.26 (625,24,104,13)    |
| <a href="#">GO:0051246</a> | regulation of protein metabolic process                                                | 2.22E-4 | 4.48E-2     | 1.68 (625,175,100,47)   |
| <a href="#">GO:0048869</a> | cellular developmental process                                                         | 2.36E-4 | 4.6E-2      | 2.23 (625,135,52,25)    |
| <a href="#">GO:0010810</a> | regulation of cell-substrate adhesion                                                  | 2.36E-4 | 4.47E-2     | 2.34 (625,33,162,20)    |
| <a href="#">GO:0051173</a> | positive regulation of nitrogen compound metabolic process                             | 2.41E-4 | 4.43E-2     | 1.27 (625,163,334,111)  |
| <a href="#">GO:0051094</a> | positive regulation of developmental process                                           | 3.03E-4 | 5.41E-2     | 1.94 (625,102,104,33)   |

# **Pancreatic Stellate Cells GO analysis of 400 Identified proteins**

# Cellular Component

| <b>GO term</b>             | <b>Description</b>                       | <b><u>P-value</u></b> | <b><u>FDR q-value</u></b> | <b><u>Enrichment (N, B, n, b)</u></b> |
|----------------------------|------------------------------------------|-----------------------|---------------------------|---------------------------------------|
| <a href="#">GO:0044420</a> | extracellular matrix component           | 7.43E-11              | 4.44E-8                   | 20.15 (340,15,9,8)                    |
| <a href="#">GO:0005581</a> | collagen trimer                          | 4.97E-7               | 1.49E-4                   | 10.07 (340,18,15,8)                   |
| <a href="#">GO:0005583</a> | fibrillar collagen trimer                | 6.71E-7               | 1.34E-4                   | 23.61 (340,8,9,5)                     |
| <a href="#">GO:0062023</a> | collagen-containing extracellular matrix | 6.83E-7               | 1.02E-4                   | 2.17 (340,76,70,34)                   |
| <a href="#">GO:0031012</a> | extracellular matrix                     | 1.84E-6               | 2.2E-4                    | 2.10 (340,86,64,34)                   |
| <a href="#">GO:0005584</a> | collagen type I trimer                   | 2.08E-4               | 2.08E-2                   | 85.00 (340,2,4,2)                     |
| <a href="#">GO:0044421</a> | extracellular region part                | 2.39E-4               | 2.04E-2                   | 1.61 (340,165,46,36)                  |
| <a href="#">GO:0005604</a> | basement membrane                        | 2.52E-4               | 1.89E-2                   | 4.55 (340,21,32,9)                    |
| <a href="#">GO:0005576</a> | extracellular region                     | 2.82E-4               | 1.87E-2                   | 1.39 (340,151,105,65)                 |
| <a href="#">GO:0005615</a> | extracellular space                      | 5.57E-4               | 3.33E-2                   | 1.25 (340,143,181,95)                 |

# Molecular Function

| <b>GO term</b>             | <b>Description</b>                                                      | <b><u>P-value</u></b> | <b><u>FDR q-value</u></b> | <b><u>Enrichment (N, B, n, b)</u></b> |
|----------------------------|-------------------------------------------------------------------------|-----------------------|---------------------------|---------------------------------------|
| <a href="#">GO:0005201</a> | extracellular matrix structural constituent                             | 2.48E-9               | 1.95E-6                   | 7.35 (340,37,15,12)                   |
| <a href="#">GO:0005198</a> | structural molecule activity                                            | 1.1E-8                | 4.31E-6                   | 5.04 (340,59,16,14)                   |
| <a href="#">GO:0030020</a> | extracellular matrix structural constituent conferring tensile strength | 2.59E-7               | 6.76E-5                   | 10.67 (340,17,15,8)                   |
| <a href="#">GO:0046332</a> | SMAD binding                                                            | 2.41E-6               | 4.73E-4                   | 30.91 (340,4,11,4)                    |
| <a href="#">GO:0019838</a> | growth factor binding                                                   | 5.8E-6                | 9.09E-4                   | 3.67 (340,22,59,14)                   |
| <a href="#">GO:0048407</a> | platelet-derived growth factor binding                                  | 6.88E-5               | 8.99E-3                   | 18.89 (340,8,9,4)                     |
| <a href="#">GO:0005520</a> | insulin-like growth factor binding                                      | 3.35E-4               | 3.75E-2                   | 4.25 (340,8,70,7)                     |

# Biological Processes

| GO term                    | Description                                     | <a href="#">P-value</a> | <a href="#">FDR q-value</a> | <a href="#">Enrichment (N, B, n, b)</a> |
|----------------------------|-------------------------------------------------|-------------------------|-----------------------------|-----------------------------------------|
| <a href="#">GO:0043588</a> | skin development                                | 1.52E-6                 | 7.39E-3                     | 30.22 (340,5,9,4)                       |
| <a href="#">GO:0007155</a> | cell adhesion                                   | 3.73E-6                 | 9.07E-3                     | 4.74 (340,43,20,12)                     |
| <a href="#">GO:0022610</a> | biological adhesion                             | 4.93E-6                 | 8E-3                        | 4.64 (340,44,20,12)                     |
| <a href="#">GO:0001501</a> | skeletal system development                     | 7.27E-6                 | 8.85E-3                     | 27.76 (340,7,7,4)                       |
| <a href="#">GO:0071230</a> | cellular response to amino acid stimulus        | 1.05E-5                 | 1.03E-2                     | 27.20 (340,10,5,4)                      |
| <a href="#">GO:0071229</a> | cellular response to acid chemical              | 1.06E-5                 | 8.63E-3                     | 5.75 (340,14,38,9)                      |
| <a href="#">GO:0001568</a> | blood vessel development                        | 1.19E-5                 | 8.29E-3                     | 25.19 (340,6,9,4)                       |
| <a href="#">GO:0030199</a> | collagen fibril organization                    | 1.45E-5                 | 8.85E-3                     | 15.74 (340,12,9,5)                      |
| <a href="#">GO:0043200</a> | response to amino acid                          | 1.7E-5                  | 9.17E-3                     | 24.73 (340,11,5,4)                      |
| <a href="#">GO:0001101</a> | response to acid chemical                       | 2.57E-5                 | 1.25E-2                     | 5.37 (340,15,38,9)                      |
| <a href="#">GO:0071495</a> | cellular response to endogenous stimulus        | 3.11E-5                 | 1.38E-2                     | 3.58 (340,38,35,14)                     |
| <a href="#">GO:0009653</a> | anatomical structure morphogenesis              | 7.7E-5                  | 3.12E-2                     | 3.40 (340,65,20,13)                     |
| <a href="#">GO:0070887</a> | cellular response to chemical stimulus          | 7.75E-5                 | 2.9E-2                      | 2.27 (340,86,40,23)                     |
| <a href="#">GO:0030198</a> | extracellular matrix organization               | 2.03E-4                 | 7.04E-2                     | 5.40 (340,36,14,8)                      |
| <a href="#">GO:0043589</a> | skin morphogenesis                              | 2.08E-4                 | 6.76E-2                     | 85.00 (340,2,4,2)                       |
| <a href="#">GO:1901698</a> | response to nitrogen compound                   | 2.33E-4                 | 7.1E-2                      | 3.53 (340,33,35,12)                     |
| <a href="#">GO:0071310</a> | cellular response to organic substance          | 2.64E-4                 | 7.55E-2                     | 2.36 (340,72,40,20)                     |
| <a href="#">GO:1901699</a> | cellular response to nitrogen compound          | 4.25E-4                 | 1.15E-1                     | 5.95 (340,25,16,7)                      |
| <a href="#">GO:1901701</a> | cellular response to oxygen-containing compound | 6.06E-4                 | 1.55E-1                     | 2.89 (340,47,35,14)                     |
| <a href="#">GO:0043062</a> | extracellular structure organization            | 7.16E-4                 | 1.74E-1                     | 4.63 (340,42,14,8)                      |
| <a href="#">GO:0009719</a> | response to endogenous stimulus                 | 8.17E-4                 | 1.89E-1                     | 2.83 (340,48,35,14)                     |
| <a href="#">GO:0050789</a> | regulation of biological process                | 8.52E-4                 | 1.88E-1                     | 1.18 (340,258,104,93)                   |
| <a href="#">GO:0051716</a> | cellular response to stimulus                   | 9.46E-4                 | 2E-1                        | 2.02 (340,106,35,22)                    |
| <a href="#">GO:0071417</a> | cellular response to organonitrogen compound    | 9.68E-4                 | 1.96E-1                     | 11.33 (340,24,5,4)                      |
| <a href="#">GO:1901700</a> | response to oxygen-containing compound          | 9.87E-4                 | 1.92E-1                     | 2.65 (340,55,35,15)                     |



**Co Culture condition GO  
analysis of 540 Identified  
proteins**

# Cellular Component

| <b>GO term</b>             | <b>Description</b>                       | <b><u>P-value</u></b> | <b><u>FDR q-value</u></b> | <b><u>Enrichment (N, B, n, b)</u></b> |
|----------------------------|------------------------------------------|-----------------------|---------------------------|---------------------------------------|
| <a href="#">GO:0044421</a> | extracellular region part                | 1.2E-8                | 8.55E-6                   | 1.70 (469,213,79,61)                  |
| <a href="#">GO:0005576</a> | extracellular region                     | 2.23E-8               | 7.92E-6                   | 1.52 (469,192,141,88)                 |
| <a href="#">GO:0044420</a> | extracellular matrix component           | 4.83E-8               | 1.14E-5                   | 17.37 (469,21,9,7)                    |
| <a href="#">GO:0031012</a> | extracellular matrix                     | 2.96E-7               | 5.26E-5                   | 2.28 (469,109,66,35)                  |
| <a href="#">GO:0005581</a> | collagen trimer                          | 6.77E-7               | 9.62E-5                   | 24.68 (469,19,5,5)                    |
| <a href="#">GO:0005615</a> | extracellular space                      | 9.52E-7               | 1.13E-4                   | 1.75 (469,172,81,52)                  |
| <a href="#">GO:0005583</a> | fibrillar collagen trimer                | 1.64E-6               | 1.66E-4                   | 41.69 (469,9,5,4)                     |
| <a href="#">GO:0005584</a> | collagen type I trimer                   | 9.11E-6               | 8.09E-4                   | 234.50 (469,2,2,2)                    |
| <a href="#">GO:0062023</a> | collagen-containing extracellular matrix | 2.36E-5               | 1.86E-3                   | 2.18 (469,98,66,30)                   |
| <a href="#">GO:0005604</a> | basement membrane                        | 6.55E-4               | 4.65E-2                   | 3.01 (469,27,75,13)                   |

# Molecular Function

| <b>GO term</b>             | <b>Description</b>                                                      | <b><u>P-value</u></b> | <b><u>FDR q-value</u></b> | <b><u>Enrichment (N, B, n, b)</u></b> |
|----------------------------|-------------------------------------------------------------------------|-----------------------|---------------------------|---------------------------------------|
| <a href="#">GO:0046332</a> | SMAD binding                                                            | 3.01E-8               | 3.05E-5                   | 78.17 (469,4,6,4)                     |
| <a href="#">GO:0030020</a> | extracellular matrix structural constituent conferring tensile strength | 1.89E-7               | 9.58E-5                   | 29.31 (469,16,5,5)                    |
| <a href="#">GO:0005201</a> | extracellular matrix structural constituent                             | 5.27E-7               | 1.78E-4                   | 7.99 (469,48,11,9)                    |
| <a href="#">GO:0005198</a> | structural molecule activity                                            | 1.85E-6               | 4.69E-4                   | 5.61 (469,76,11,10)                   |
| <a href="#">GO:0019838</a> | growth factor binding                                                   | 3.1E-5                | 6.28E-3                   | 4.28 (469,28,47,12)                   |
| <a href="#">GO:0048407</a> | platelet-derived growth factor binding                                  | 2.71E-4               | 4.57E-2                   | 31.27 (469,9,5,3)                     |
| <a href="#">GO:0044389</a> | ubiquitin-like protein ligase binding                                   | 2.74E-4               | 3.96E-2                   | 2.35 (469,18,166,15)                  |
| <a href="#">GO:0031625</a> | ubiquitin protein ligase binding                                        | 2.74E-4               | 3.47E-2                   | 2.35 (469,18,166,15)                  |
| <a href="#">GO:0050839</a> | cell adhesion molecule binding                                          | 4.37E-4               | 4.92E-2                   | 6.17 (469,38,14,7)                    |
| <a href="#">GO:0043168</a> | anion binding                                                           | 5.55E-4               | 5.62E-2                   | 2.19 (469,118,40,22)                  |

# Biological Processes

| GO term                    | Description                                     | P-value | FDR q-value | Enrichment (N, B, n, b) |
|----------------------------|-------------------------------------------------|---------|-------------|-------------------------|
| <a href="#">GO:0071310</a> | cellular response to organic substance          | 2E-8    | 1.16E-4     | 2.11 (469,87,115,45)    |
| <a href="#">GO:0070887</a> | cellular response to chemical stimulus          | 1.25E-7 | 3.62E-4     | 1.94 (469,103,115,49)   |
| <a href="#">GO:0071229</a> | cellular response to acid chemical              | 2.48E-7 | 4.82E-4     | 6.68 (469,13,54,10)     |
| <a href="#">GO:0071230</a> | cellular response to amino acid stimulus        | 6.66E-7 | 9.69E-4     | 7.72 (469,9,54,8)       |
| <a href="#">GO:0010033</a> | response to organic substance                   | 6.69E-7 | 7.78E-4     | 1.97 (469,115,91,44)    |
| <a href="#">GO:0071495</a> | cellular response to endogenous stimulus        | 8.11E-7 | 7.86E-4     | 2.89 (469,42,89,23)     |
| <a href="#">GO:0001101</a> | response to acid chemical                       | 9.03E-7 | 7.5E-4      | 6.20 (469,14,54,10)     |
| <a href="#">GO:0009719</a> | response to endogenous stimulus                 | 1.85E-6 | 1.34E-3     | 2.31 (469,53,115,30)    |
| <a href="#">GO:0042221</a> | response to chemical                            | 1.86E-6 | 1.2E-3      | 1.83 (469,135,91,48)    |
| <a href="#">GO:0043200</a> | response to amino acid                          | 2.98E-6 | 1.73E-3     | 37.52 (469,10,5,4)      |
| <a href="#">GO:0009653</a> | anatomical structure morphogenesis              | 3.75E-6 | 1.98E-3     | 3.55 (469,88,24,16)     |
| <a href="#">GO:0051716</a> | cellular response to stimulus                   | 6.81E-6 | 3.3E-3      | 1.80 (469,132,93,47)    |
| <a href="#">GO:0043589</a> | skin morphogenesis                              | 9.11E-6 | 4.08E-3     | 234.50 (469,2,2,2)      |
| <a href="#">GO:0022610</a> | biological adhesion                             | 2.51E-5 | 1.04E-2     | 4.32 (469,62,21,12)     |
| <a href="#">GO:0032502</a> | developmental process                           | 2.63E-5 | 1.02E-2     | 1.51 (469,216,86,60)    |
| <a href="#">GO:0030199</a> | collagen fibril organization                    | 2.87E-5 | 1.04E-2     | 25.01 (469,15,5,4)      |
| <a href="#">GO:0048856</a> | anatomical structure development                | 3.4E-5  | 1.16E-2     | 1.74 (469,148,82,45)    |
| <a href="#">GO:0043588</a> | skin development                                | 4.1E-5  | 1.32E-2     | 46.90 (469,6,5,3)       |
| <a href="#">GO:0034097</a> | response to cytokine                            | 4.34E-5 | 1.33E-2     | 2.27 (469,45,115,25)    |
| <a href="#">GO:0001501</a> | skeletal system development                     | 7.46E-5 | 2.17E-2     | 20.84 (469,10,9,4)      |
| <a href="#">GO:1901701</a> | cellular response to oxygen-containing compound | 8.41E-5 | 2.33E-2     | 2.38 (469,52,87,23)     |
| <a href="#">GO:1901699</a> | cellular response to nitrogen compound          | 8.87E-5 | 2.35E-2     | 7.60 (469,27,16,7)      |
| <a href="#">GO:0007155</a> | cell adhesion                                   | 1.45E-4 | 3.67E-2     | 3.36 (469,61,32,14)     |
| <a href="#">GO:0009887</a> | animal organ morphogenesis                      | 1.47E-4 | 3.55E-2     | 5.21 (469,30,27,9)      |
| <a href="#">GO:1901698</a> | response to nitrogen compound                   | 2.58E-4 | 6.01E-2     | 3.20 (469,38,54,14)     |
| <a href="#">GO:0009725</a> | response to hormone                             | 2.9E-4  | 6.48E-2     | 2.66 (469,23,115,15)    |
| <a href="#">GO:0001568</a> | blood vessel development                        | 3.7E-4  | 7.96E-2     | 28.14 (469,10,5,3)      |
| <a href="#">GO:0071417</a> | cellular response to organonitrogen compound    | 4.12E-4 | 8.57E-2     | 3.67 (469,26,54,11)     |
| <a href="#">GO:1901700</a> | response to oxygen-containing compound          | 4.72E-4 | 9.46E-2     | 2.11 (469,64,87,25)     |
| <a href="#">GO:0010243</a> | response to organonitrogen compound             | 4.82E-4 | 9.33E-2     | 3.23 (469,35,54,13)     |
| <a href="#">GO:0040012</a> | regulation of locomotion                        | 5.9E-4  | 1.11E-1     | 1.15 (469,89,400,87)    |
| <a href="#">GO:0001957</a> | intramembranous ossification                    | 6.01E-4 | 1.09E-1     | 39.08 (469,2,12,2)      |
| <a href="#">GO:0061564</a> | axon development                                | 6.01E-4 | 1.06E-1     | 39.08 (469,2,12,2)      |
| <a href="#">GO:0031103</a> | axon regeneration                               | 6.01E-4 | 1.03E-1     | 39.08 (469,2,12,2)      |
| <a href="#">GO:0036072</a> | direct ossification                             | 6.01E-4 | 9.99E-2     | 39.08 (469,2,12,2)      |
